# Supplementary material
Source: PubMed Central journal article supplement (PMC3726169)
Supplement: JCI68487sd.pdf [file JCI68487sd.pdf]

## SUPPLEMENTARY INFORMATION

### **Novel therapeutic approach targeting anemia of chronic disease and inflammation**

Chanté L. Richardson<sup>1</sup>, Lorrie L. Delehanty<sup>1</sup>, Grant C. Bullock<sup>1‡</sup>, Claudia M. Rival<sup>1</sup>, Kenneth S. Tung<sup>1</sup>, Donald L. Kimpel<sup>2</sup>, Sara Gardenghi<sup>3</sup>, Stefano Rivella<sup>3</sup>, and Adam N. Goldfarb<sup>1\*</sup>

<sup>1</sup> Department of Pathology, University of Virginia, School of Medicine, Charlottesville, VA, USA

<sup>2</sup> Department of Medicine, University of Virginia, School of Medicine, Charlottesville, VA, USA

<sup>3</sup> Department of Pediatrics, Hematology-Oncology, Weill Cornell Medical College, New York, NY, USA

Address correspondence to: Adam N. Goldfarb, University of Virginia, School of Medicine, PO Box 8000904, Charlottesville, VA 22908; Email: [ang3x@virginia.edu](mailto:ang3x@virginia.edu).

### **COMPETING FINANCIAL INTERESTS**

The authors have declared that no conflict of interest exists.

‡Current address: Department of Pathology, University of Pittsburgh Medical Center, Pittsburgh, PA, USA

## SUPPLEMENTAL RESULTS

### Evidence that isocitrate does not act as an anti-inflammatory agent

Isocitrate potentially could promote erythropoiesis indirectly through an anti-inflammatory mechanism. However, several findings argue against this possibility. Firstly, at a time point when isocitrate significantly enhanced erythropoiesis in the rat ACDI model (**Figs. 1C, D**), it had no effects on splenic infiltration by myeloid cells (**Supplemental Figs. 2A, B.**) or marrow infiltration by T cells (**Supplemental Fig. 1D.**). Secondly, isocitrate injections did not affect the rapid-onset neutrophilia/anemia seen in a murine model of acute inflammation, involving intraperitoneal injection of heat-killed *Brucella abortus*(1) (**Supplemental Fig. 3D**). Thirdly, isocitrate had no effect on the degree of end-organ inflammation in three different models of autoimmune disease (spontaneous autoimmune orchitis, orchitis induction by regulatory T cell depletion plus vasectomy(2), neonatal autoimmune oophoritis(3)) (**Supplemental Figs. 3A,B,C**). In the rodent ACDI model, isocitrate did diminish circulating neutrophilia (**Supplemental Table 1**), but this effect is likely secondary to its enhancement of erythropoiesis. Specifically, this correction of neutrophilia may be secondary to anti-inflammatory effect of mobilizing iron,(4, 5) as we observe a decrease in hepcidin levels with isocitrate treatment in **Fig. 1F**, and/or due to isocitrate's potential ability to exert its effects at the level of marrow lineage reprogramming.(6)

## Supplemental Figure 1

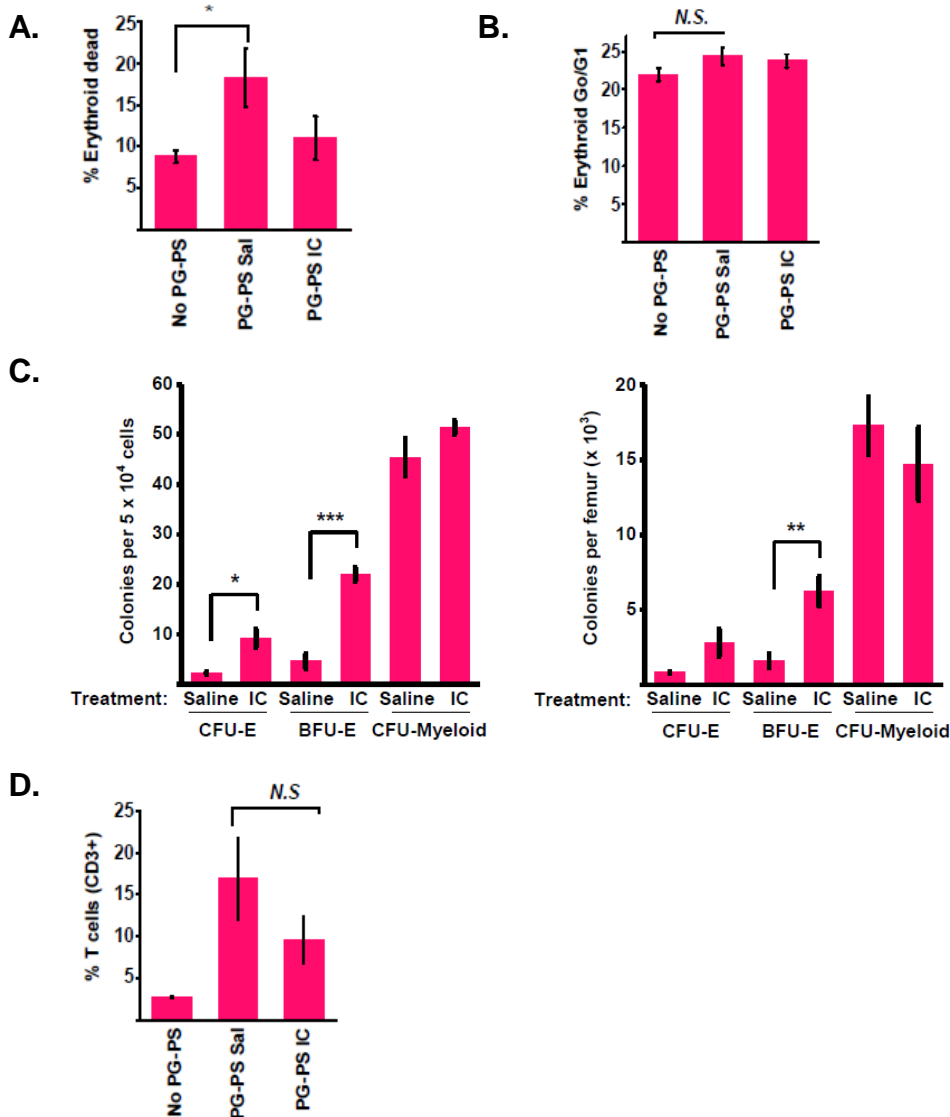

**Supplemental Figure 1** Additional studies of marrow from rats in Figure 1D, E. **(A)** Cell death in erythroid precursors from control and arthritic animals  $\pm$  isocitrate treatment. Marrow samples (see **Figure 1D**) were costained with anti-CD71, annexin V, and 7-AAD followed by flow cytometry. Shown are percentages of CD71<sup>Bright</sup> SSC<sup>Low</sup> cells that costain with annexin V and 7-AAD. N = 5/group. **(B)** Cell cycle profiles in erythroid precursors from control and arthritic animals  $\pm$  isocitrate treatment. Marrow samples (**Figure 1D**) were stained with anti-CD71 and propidium iodide (PI) followed by flow cytometry. Shown are percentages of CD71<sup>Bright</sup> SSC<sup>Low</sup> cells in Go/G1-phase N = 5/group. **(C)** Isocitrate treatment of rats with ACDI enhances marrow erythroid colony forming activity. Animals treated as in **Figure 1B** were euthanized on day 21 for marrow analysis by colony forming assays. Colonies were analyzed on day 8 post seeding of  $5 \times 10^4$  marrow cells in 1 mL Methocult M3434 (Stem Cell Technologies) in 35-mm plates. For each animal duplicate cultures were performed. **(D)** The animals from **Figure 1D** underwent assessment of marrow infiltration by T cells (CD3<sup>+</sup>). For all graphs: N = 4-5/group. All data are mean  $\pm$  s.e.m., \* $P$  < 0.05, \*\* $P$  < 0.01, \*\*\* $P$  < 0.001.

## Supplemental Figure 2

A.

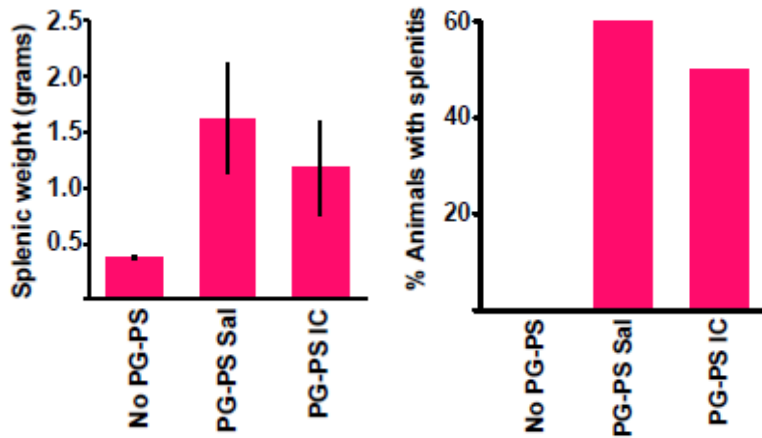

B.

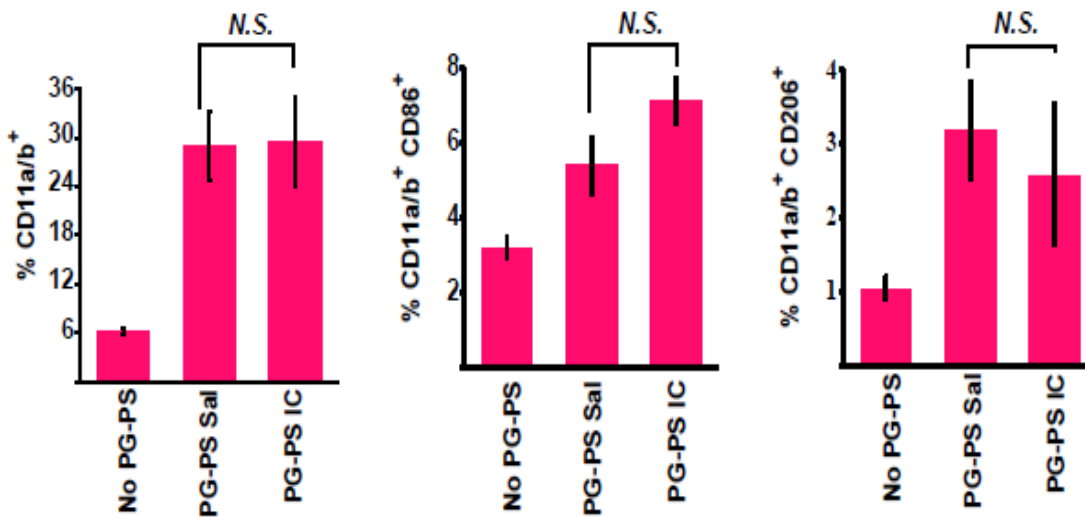

**Supplemental Figure 2** Analysis of the effects of IC treatment on splenic changes in the rat ACDI model. **(A)** The animals from Figure 1D underwent assessment of spleens for weight, splenitis defined by the presence of granulomatous inflammation, and extent of infiltration by myeloid cells. Granulomatous inflammation was detected by light microscopy of hematoxylin and eosin stained tissue samples. **(B)** Infiltration by total myeloid cells (CD11a/b<sup>+</sup>) and by macrophage subsets M1 (CD86<sup>+</sup>), and M2 (CD206<sup>+</sup>) was determined by flow cytometry. For all graphs: N = 5/group. All data are mean  $\pm$  s.e.m.

### Supplemental Figure 3

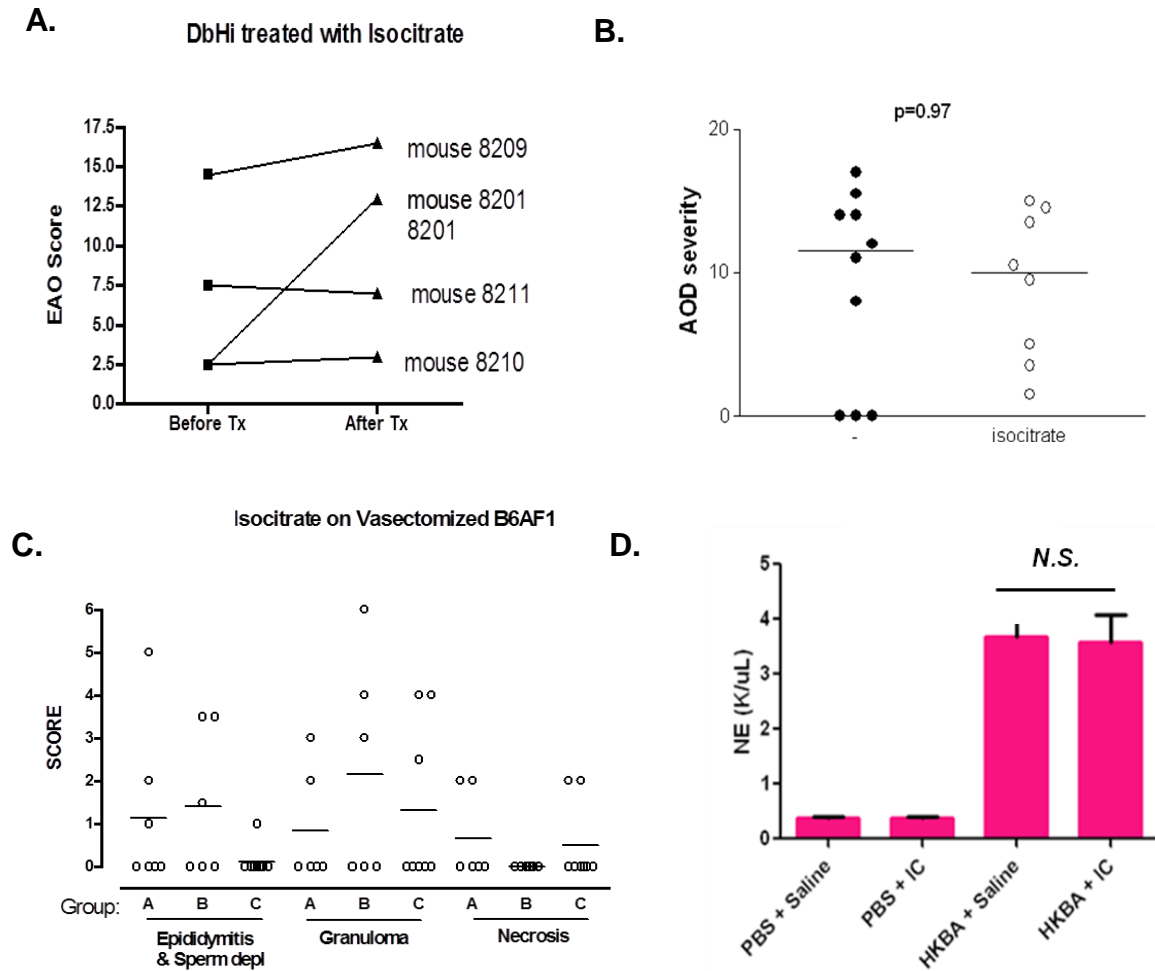

**Supplemental Figure 3** Analysis of the effects of IC treatment in multiple murine models of inflammation. **(A)** Neonatal autoimmune ovarian disease (nAOD) elicited by autoantibody injection. As described by Setiady et al.(3) B6AF1 pups received injections of the anti-ZP3 antibody on post-natal days 3 and 5, followed by blinded scoring of ovarian inflammation (AOD severity) on post-natal day 14. Isocitrate treatment consisted of daily injections of 0.4 mg/animal on post-natal days 3-10. **(B)** Spontaneous autoimmune orchitis in OVA/OVA-TCR double transgenic mice (developed by Dr. Kenneth Tung, University of Virginia, Unpublished). Adult males transgenic for ovalbumin expression in male haploid germ cells and for T cell receptor specific for an ovalbumin epitope (DO11.10) underwent unilateral orchiectomy followed by a 10 day treatment course of IC at 200 mg/kg/day followed by removal of the contralateral testis. Pre- and post-treatment specimens were blindly scored for inflammation (Experimental Autoimmune Orchitis Score) as described.(2) **(C)** Epididymitis associated with vasectomy and regulatory T cell depletion. As described by Wheeler et al.(2) adult B6AF1 male mice underwent bilateral vasectomy followed by anti-CD25 mediated regulatory T cell depletion. 3 weeks post vasectomy, animals were assessed for epididymal inflammation, sperm depletion, granuloma formation, and necrosis, as described.(2) Group A received daily IC at 200mg/kg/day for 3 weeks; Group B received a similar regimen for 2 weeks; and Group C consisted of saline treated controls. **(D)** Rapid induction of acute inflammation and neutrophilia. As per Sasu et al.(1) adult C57BL/6 mice received a single intraperitoneal injection of heat-killed *Brucella abortus* on day 0. Day 11-15, mice received intraperitoneal injection of 200mg/kg/day of isocitrate or equivalent volume of saline daily. For all graphs: N = 4-10/group. All data are mean  $\pm$  s.e.m., \* $P < 0.05$

## Supplemental Figure 4

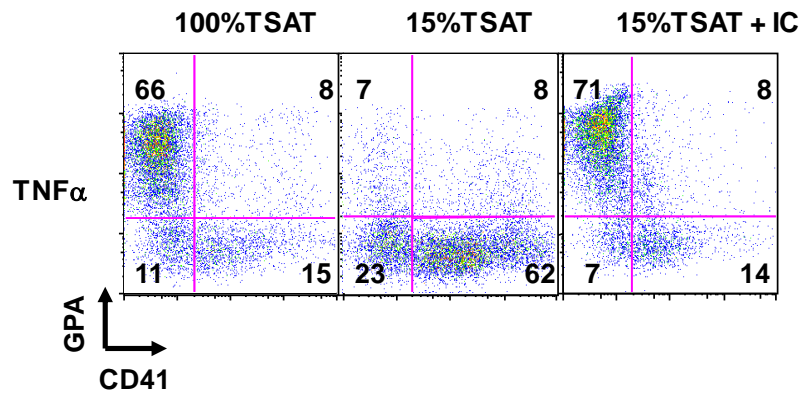

**Supplemental Figure 4** The cooperative inhibition of erythroid differentiation by iron restriction and TNF $\alpha$  is also reversed by isocitrate treatment. This experiment was conducted exactly as in **Fig. 2A** except that TNF $\alpha$  rather than IFN $\gamma$  was used as the inflammatory stimulus.

## Supplemental Figure 5

A.

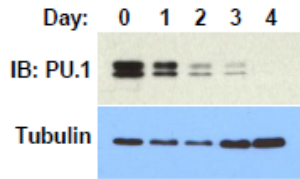

B.

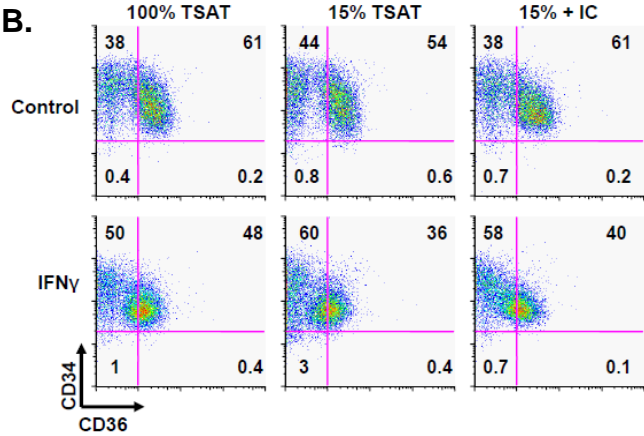

C.

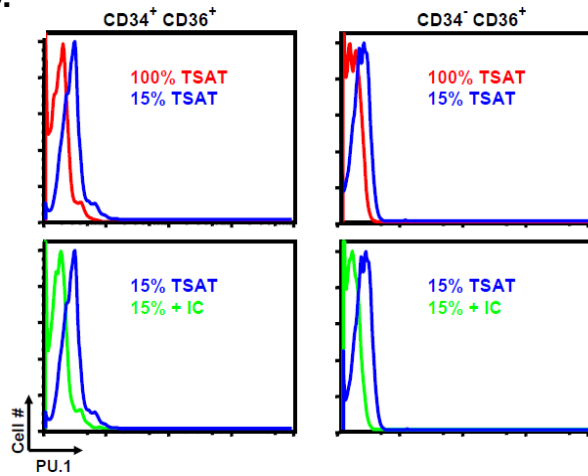

D.

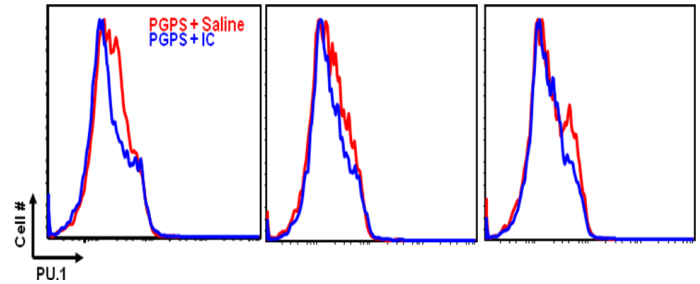

E.

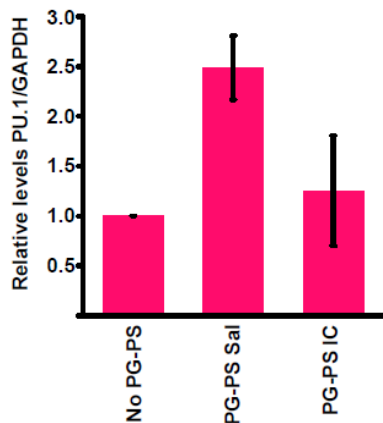

**Supplemental Figure 5 (A)** Kinetics of PU.1 downregulation during normal erythroid differentiation. Human CD34<sup>+</sup> cells were cultured in erythroid medium for the indicated days prior to immunoblot. **(B)** No significant influence of iron restriction or isocitrate on early erythroid commitment. Human CD34<sup>+</sup> cells were cultured 3 days in erythroid medium under the indicated conditions, followed by flow cytometry. **(C)** Effects of iron restriction and isocitrate treatment on PU.1 levels in early (CD34<sup>+</sup> CD36<sup>+</sup>) and later (CD34<sup>-</sup> CD36<sup>+</sup>) erythroid progenitors. Human CD34<sup>+</sup> cells cultured 3 days in erythroid medium with 100% or 15% transferrin saturation + isocitrate treatment underwent flow cytometry for intracellular PU.1 detection as in **Fig. 4D**. **(D)** Effects of isocitrate treatment on PU.1 levels in erythroid progenitors from rats with ACDI. Animals treated as in **Figure 1B** underwent euthanasia on day 21 followed by flow cytometry for intracellular PU.1 detection in marrow erythroid progenitors (SSC<sup>Low</sup> CD71<sup>High</sup>). Each plot shows an overlay of two different rats. **(E)** PU.1 mRNA expression in sorted erythroid progenitors from rats treated with ACDI. Rats treated as in **Fig 1D** underwent sorting of marrow erythroid precursors (CD71<sup>+</sup> CD11b<sup>-</sup>) followed by qPCR for PU.1, with normalization to GAPDH. Shown are mean  $\pm$  s.e.m for 3 independent experiments.

## Supplemental Figure 6

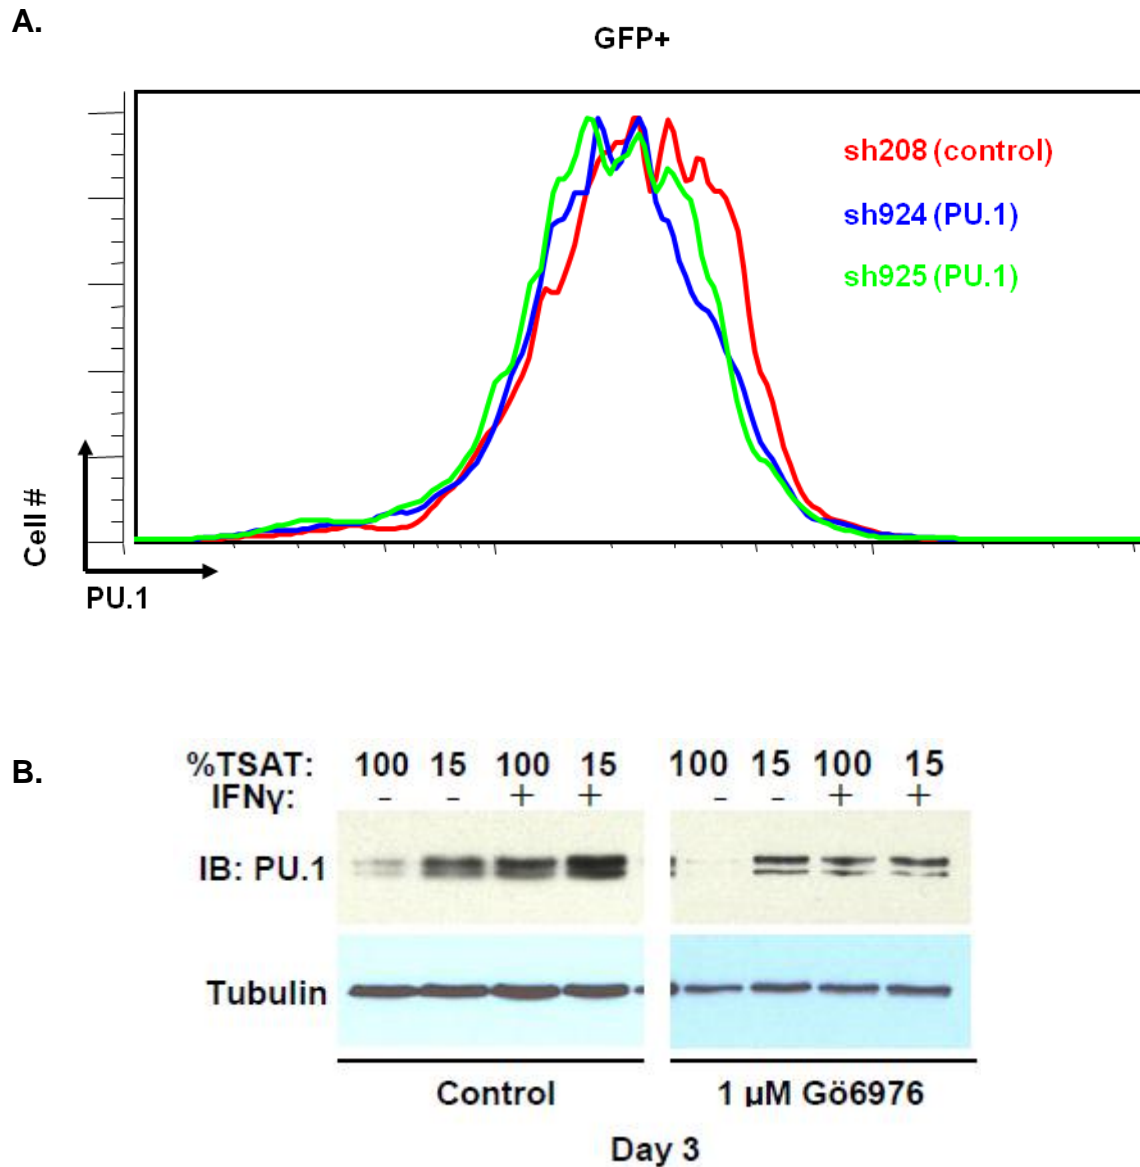

**Supplemental Figure 6** shRNA knockdown of PU.1 in human CD34<sup>+</sup> cells and inhibition of PU.1 upregulation by PKC inhibitor. **(A)** shRNA knockdown of PU.1 in primary human progenitors subjected to iron deprivation and IFN $\gamma$  treatment. Human CD34<sup>+</sup> cells transduced with GFP-containing lentiviral shRNA constructs were cultured in erythroid medium with 15% transferrin saturation and IFN $\gamma$  for 2 days, followed by intracellular staining for PU.1 and analysis by flow cytometry with gating on GFP<sup>+</sup> cells. **(B)** Gö6976, an inhibitor of PKC that is unrelated to BIM, also inhibits PU.1 upregulation by the combination of iron restriction and IFN $\gamma$ . Human CD34<sup>+</sup> cells cultured as in **Fig. 4A** were treated where indicated with 1  $\mu$ M of Gö6976, followed by immunoblot.

**Supplemental Table 1: Complete blood count (CBC) parameters in ACDI rodent model.**

|                   | Day 7              |                       | Day 14             |                      | Day 18             |                           |                        | Day 35             |                           |                     |
|-------------------|--------------------|-----------------------|--------------------|----------------------|--------------------|---------------------------|------------------------|--------------------|---------------------------|---------------------|
|                   | <u>Saline</u>      | <u>PG-PS</u>          | <u>Saline</u>      | <u>PG-PS</u>         | <u>Saline</u>      | <u>PG-PS +<br/>Saline</u> | <u>PG-PS +<br/>IC</u>  | <u>Saline</u>      | <u>PG-PS +<br/>Saline</u> | <u>PG-PS + IC</u>   |
| RBC (M/ $\mu$ L)  | 8.77<br>$\pm 0.9$  | 7.49<br>$\pm 0.1$     | 8.03<br>$\pm 0.2$  | 6.85*<br>$\pm 0.3$   | 7.54<br>$\pm 0.2$  | 6.1*<br>$\pm 0.2$         | 8.11#<br>$\pm 0.6$     | 9.51<br>$\pm 1$    | 7.51<br>$\pm 0.2$         | 8.51#<br>$\pm 0.2$  |
| HB (g/dL)         | 15.04<br>$\pm 0.3$ | 13.86**<br>$\pm 0.1$  | 15.38<br>$\pm 0.2$ | 12.68**<br>$\pm 0.7$ | 14.18<br>$\pm 0.3$ | 10.8***<br>$\pm 0.3$      | 14.08#<br>$\pm 0.9$    | 14.4<br>$\pm 0.3$  | 12.04***<br>$\pm 0.2$     | 14.18#<br>$\pm 0.6$ |
| HCT (%)           | 54.36<br>$\pm 5.8$ | 44.86<br>$\pm 0.8$    | 44.92<br>$\pm 0.8$ | 39.74*<br>$\pm 2.3$  | 46.42<br>$\pm 1$   | 32.6***<br>$\pm 1.1$      | 48.76<br>$\pm 3$       | 57.06<br>$\pm 5.6$ | 39.08*<br>$\pm 0.8$       | 48.9<br>$\pm 2.9$   |
| MCV (fL)          | 61.88<br>$\pm 0.3$ | 59.85***<br>$\pm 0.4$ | 61.3<br>$\pm 0.5$  | 57.74**<br>$\pm 1$   | 61.6<br>$\pm 1.2$  | 53.45***<br>$\pm 0.6$     | 60.26####<br>$\pm 0.8$ | 60.12<br>$\pm 0.3$ | 52.18*<br>$\pm 2.2$       | 55.23<br>$\pm 2.7$  |
| WBC (K/ $\mu$ L)  | 10.1<br>$\pm 0.9$  | 21.53**<br>$\pm 3.1$  | 12.21<br>$\pm 0.4$ | 28.27*<br>$\pm 5.4$  | 9.79<br>$\pm 0.6$  | 39.14**<br>$\pm 2.7$      | 19.94<br>$\pm 7.4$     | 9.68<br>$\pm 1.1$  | 37.29*<br>$\pm 10$        | 14.08<br>$\pm 2.9$  |
| NEU (K/ $\mu$ L)  | 2.56<br>$\pm 0.3$  | 14.58**<br>$\pm 3.1$  | 3.68<br>$\pm 0.3$  | 20.72**<br>$\pm 5.4$ | 2.59<br>$\pm 0.1$  | 29.35***<br>$\pm 1.7$     | 11.89#<br>$\pm 6.7$    | 2.15<br>$\pm 0.4$  | 27.15*<br>$\pm 8.5$       | 6.03<br>$\pm 2.8$   |
| MONO (K/ $\mu$ L) | 0.63<br>$\pm 0.1$  | 0.83<br>$\pm 0.1$     | 0.68<br>$\pm 0.1$  | 0.85<br>$\pm 0.2$    | 0.46<br>$\pm 0.1$  | 1.12*<br>$\pm 0.1$        | 0.77<br>$\pm 0.2$      | 0.38<br>$\pm 0.1$  | 0.99<br>$\pm 0.2$         | 0.52<br>$\pm 0.2$   |
| PLT (K/ $\mu$ L)  | 1017<br>$\pm 387$  | 687<br>$\pm 136$      | 728.8<br>$\pm 13$  | 986<br>$\pm 165$     | 641.6<br>$\pm 44$  | 839<br>$\pm 223$          | 692.6<br>$\pm 96$      | 758.2<br>$\pm 80$  | 1256.4<br>$\pm 219$       | 808.75<br>$\pm 136$ |

PG-PS was injected on day 0. RBC, red blood cell count; HB, hemoglobin; HCT, hematocrit; MCV, mean corpuscular volume; WBC, white blood cell count; MONO, monocyte count; NEU, neutrophil count, PLTs, platelet count. N=5/group. Saline v. PG-PS, \* $P < 0.05$ , \*\* $P < 0.01$ , \*\*\* $P < 0.001$ ; PG-PS + Saline v. PGPS + IC, # $P < 0.05$ . ## $P < 0.01$ , ### $P < 0.001$  All data mean  $\pm$  s.e.m.

**Supplemental Table 2: Serum studies in rat ACDI model**

| Day 7                      |               |               | Day 18        |                       |                   |
|----------------------------|---------------|---------------|---------------|-----------------------|-------------------|
|                            | <u>Saline</u> | <u>PG-PS</u>  | <u>Saline</u> | <u>PG-PS + Saline</u> | <u>PG-PS + IC</u> |
| Serum Epo (pg/mL)          | 0.09<br>±0    | 0.1<br>±0     | 0.08<br>±0    | 0.18<br>±0            | 0.16<br>±0        |
| Day 7                      |               |               |               |                       |                   |
|                            | <u>Saline</u> | <u>PG-PS</u>  |               |                       |                   |
| Serum IFN $\gamma$ (pg/mL) | 0.94<br>±0    | 2.18***<br>±0 |               |                       |                   |
| Day 14                     |               |               | Day 35        |                       |                   |
|                            | <u>Saline</u> | <u>PG-PS</u>  | <u>Saline</u> | <u>PG-PS + Saline</u> | <u>PG-PS + IC</u> |
| Serum Fe ( $\mu$ g/mL)     | 445.9<br>±81  | 353.4*<br>±40 | 335.7<br>±34  | 197.24<br>±73         | 376.61<br>±28     |
|                            |               |               |               |                       |                   |

PG-PS was injected on day 0. N=5/group. \* $P < 0.05$ , \*\* $P < 0.01$ , \*\*\* $P < 0.001$ . All data are mean  $\pm$  s.e.m.

**Supplemental Table 3: Effects of inflammatory stimuli on erythroid differentiation**

| Stimulus     | Dose          | Effects (100% TSAT) | Effects (15% TSAT) |
|--------------|---------------|---------------------|--------------------|
| IFN $\gamma$ | 1500 U/mL     | NONE                | <i>INHIBITION</i>  |
| TNF $\alpha$ | 100 ng/mL     | NONE                | <i>INHIBITION</i>  |
| TRAIL        | 500 ng/mL     | NONE                | NONE               |
| IL-1 $\beta$ | 100 ng/mL     | NONE                | NONE               |
| IL-6         | 100 ng/mL     | NONE                | NONE               |
| IL-10        | 100 ng/mL     | NONE                | NONE               |
| IL-15        | 100 ng/mL     | NONE                | NONE               |
| LPS          | 50 $\mu$ g/mL | NONE                | NONE               |

The effects of indicated stimuli on erythroid differentiation were tested as described in **Fig. 2 A, B**.

## REFERENCES

1. Sasu, B.J., Cooke, K.S., Arvedson, T.L., Plewa, C., Ellison, A.R., Sheng, J., Winters, A., Juan, T., Li, H., Begley, C.G. et al. 2010. Antihepcidin antibody treatment modulates iron metabolism and is effective in a mouse model of inflammation-induced anemia. *Blood* **115**:3616-3624.
2. Wheeler, K., Tardif, S., Rival, C., Luu, B., Bui, E., Rio, R.d., Teuscher, C., Sparwasser, T., Hardy, D., and Tung, K.S.K. 2011. Regulatory T cells control tolerogenic versus autoimmune response to sperm in vasectomy. *Proc. Natl. Acad. Sci.***108**:7511-7516.
3. Setiady, Y.Y., Samy, E.T., and Tung, K.S.K. 2003. Maternal autoantibody triggers de novo T cell-mediated neonatal autoimmune disease. *J. Immunol.***170**:4656-4664.
4. Sindrilaru, A., Peters, T., Wieschalka, S., Baican, C., Baican, A., Peter, H., Hainzl, A., Schatz, S., Qi, Y., Schlecht, A. et al. 2011. An unrestrained proinflammatory M1 macrophage population induced by iron impairs wound healing in humans and mice. *J. Clin. Invest.* **121**:985-997.
5. Andrews, F.J., Morris, C.J., Lewis, E.J., and Blake, D.R. 1987. Effect of nutritional iron deficiency on acute and chronic inflammation. *Ann. Rheum. Dis.* **46**:859-865.
6. Oduro, Kwadwo A., Liu, F., Tan, Q., Kim, C., Lubman, O., Fremont, D., Mills, J.C., and Choi, K. 2012. Myeloid skewing in murine autoimmune arthritis occurs in hematopoietic stem and primitive progenitor cells. *Blood* **120**:2203-2213.
